# Supplementary material
Source: PubMed Central journal article supplement (PMC3121503)

### Supplemental Table 1

Human Brain samples were obtained from the University of California, Irvine and were gifts from Dr. Hyman Schipper of Lady Davis Institute, Montreal.

| Sample | Age (yr) | Sex    | Pathology | PMI (hr) |
|--------|----------|--------|-----------|----------|
| AD1    | 78       | Female | AD        | 16       |
| AD2    | 82       | Female | AD        | 6.3      |
| AD3    | 77       | Female | AD        | 4.0      |
| AD4    | 87       | Male   | AD        | 24       |
| AD5    | 79       | Male   | AD        | 12       |
| AD6    | 78       | Female | AD        | 9.5      |
| AD7    | 80       | Female | AD        | 7.5      |
| N1     | 88       | Female | Normal    | 27.5     |
| N2     | 74       | Female | Normal    | 24       |
| N3     | 83       | Male   | Normal    | 10       |
| N4     | 78       | Female | Normal    | 7.5      |
| N5     | 85       | Female | Normal    | 9.5      |
| N6     | 79       | Female | Normal    | 8.5      |
| N7     | 78       | Female | Normal    | 12       |

## SUPPLEMENTAL FIGURE LEGEND

FIGURE S1. **Egr-1 protein level is elevated in AD brain.** Indicated AD (AD1 – AD7) and normal control (N1 – N7) brain samples (see supplemental Table 1 for detail) were individually homogenized and Western blotted using anti-Egr-1 or  $\beta$ -actin antibody. *A*, Western blot. *B*, Relative amount of Egr-1 protein determined from Western blots by normalizing the Egr-1 band intensity value of each sample against the respective  $\beta$ -actin band intensity value (mean  $\pm$  S.E., n = 4 (temporal cortex), 3 (hippocampus). \* $p < 0.05$ ; \*\* $p < 0.01$  (t-test).

FIGURE S2. **Cdk5 does not phosphorylate tau at Ser<sup>262</sup> *in vitro*.** Recombinant tau was phosphorylated by Cdk5 at 30 °C. At the indicated time points, aliquots were removed and analyzed via Western blotting using the indicated antibodies. A positive control for Ser<sup>262</sup> phosphorylated tau was prepared by incubating recombinant tau with a fresh rat brain extract in the presence of ATP/Mg<sup>2+</sup> at 30 °C for 2 hr.

FIGURE S3. **Cdk5 phosphorylates PP1 in NGF-exposed PC12 cells.** PC12 cells were exposed to NGF for the indicated time points. On day 5 of NGF exposure, cells were treated with olomoucine or vehicle for 1 hr and then analyzed via Western blotting using the indicated antibodies.

FIGURE S4. **PP1 dephosphorylates Ser<sup>262</sup> phosphorylated tau *in vitro*.** Recombinant tau, previously phosphorylated by kinases of rat brain extract was incubated with recombinant PP1. After 60 min, samples were analyzed via Western blotting using the indicated antibodies.

# Supplemental Figure 1

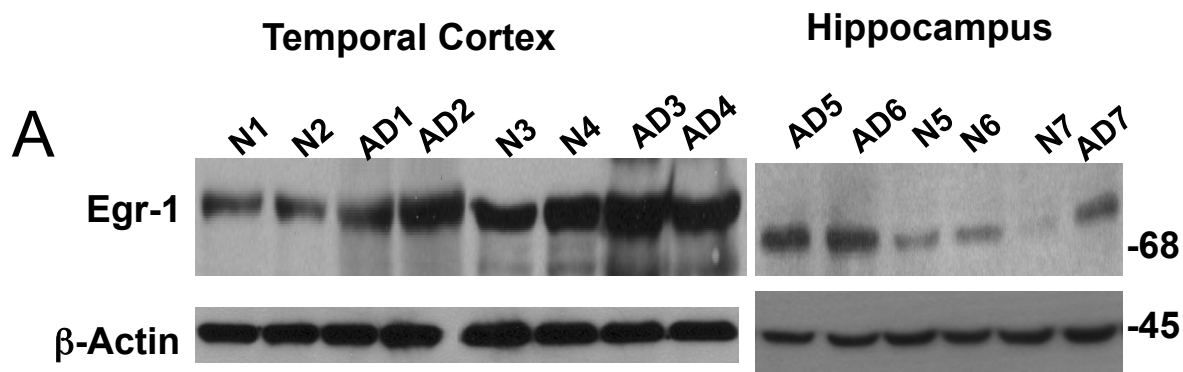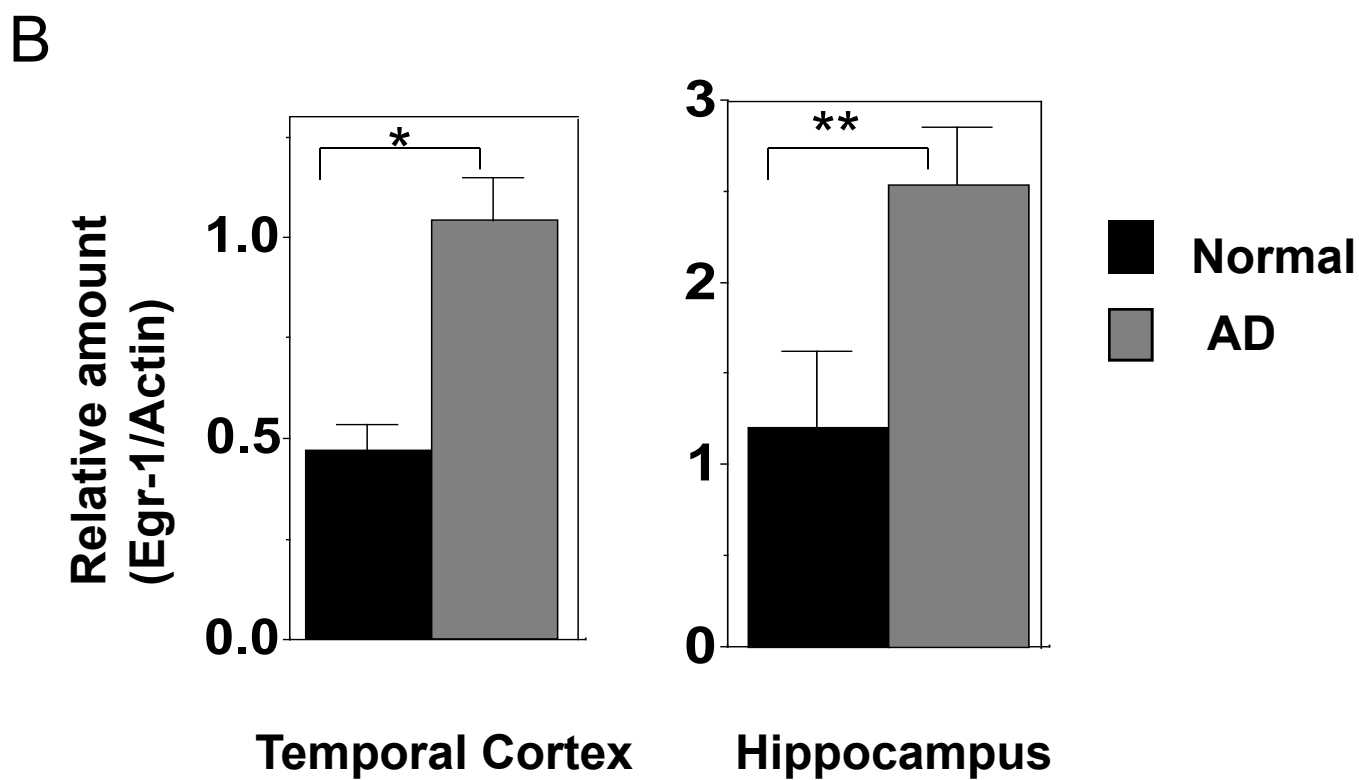

Supplemental Figure 2

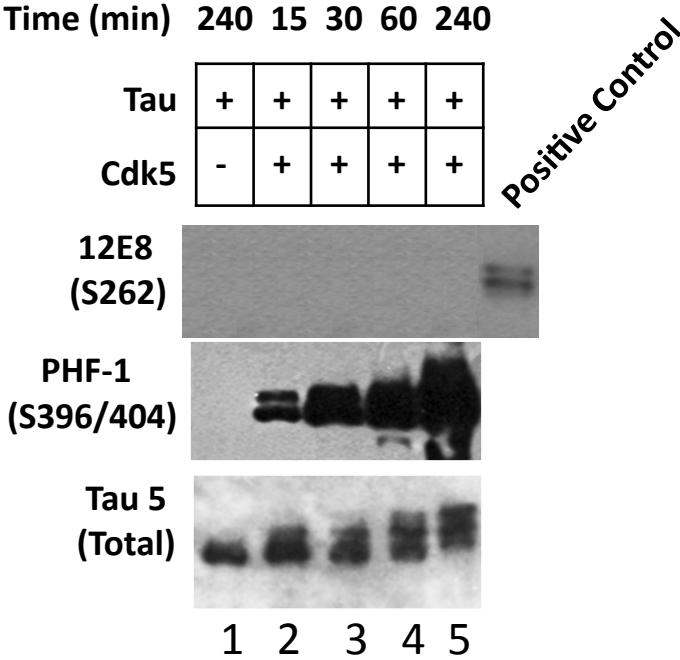

### Supplemental Figure 3

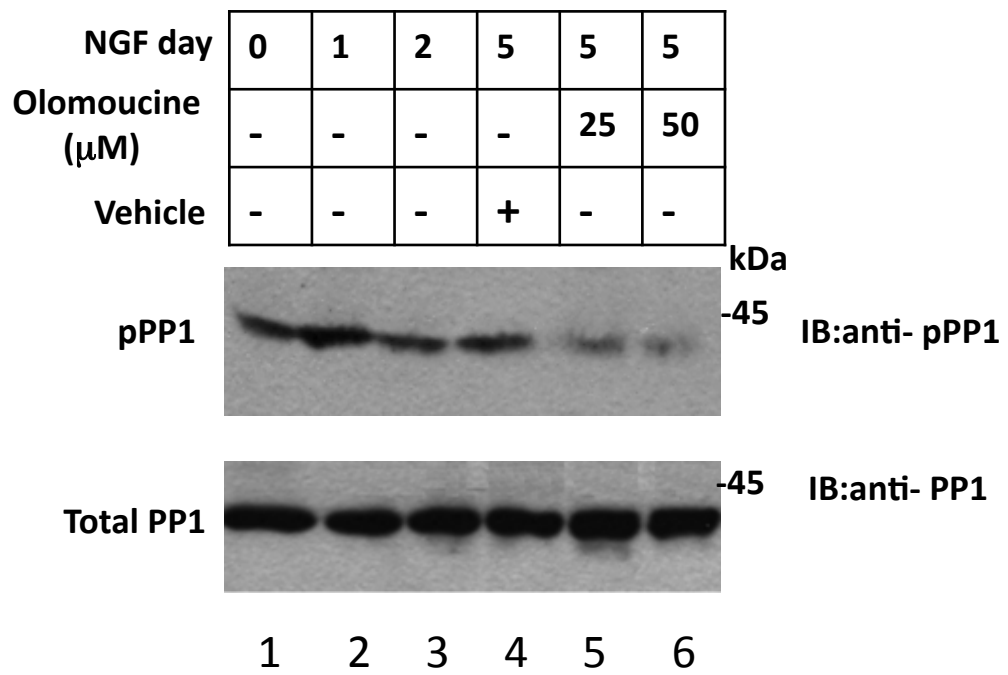

# Supplemental Figure 4

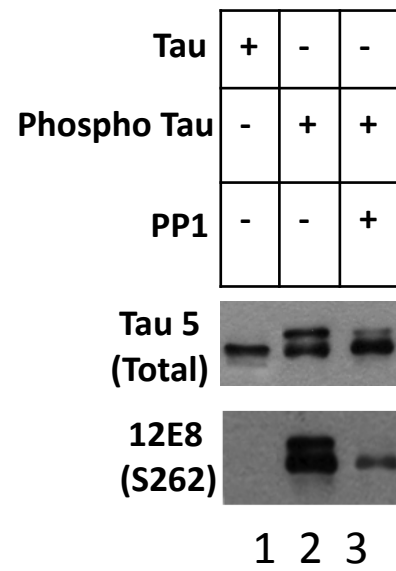

Supplement: supp_M111.220962_Supplemental_Materials.pdf [file supp_M111.220962_Supplemental_Materials.pdf]
